# Supplementary material for: Hypermethylation of BEND5 contributes to cell proliferation and is a prognostic marker of colorectal cancer
Source: PubMed Central journal article supplement (PMC5768337; doi:10.18632/oncotarget.22266), 2017-11-01
Supplement: oncotarget-08-113431-s001.pdf [file oncotarget-08-113431-s001.pdf]

## Hypermethylation of *BEND5* contributes to cell proliferation and is a prognostic marker of colorectal cancer

### SUPPLEMENTARY MATERIALS

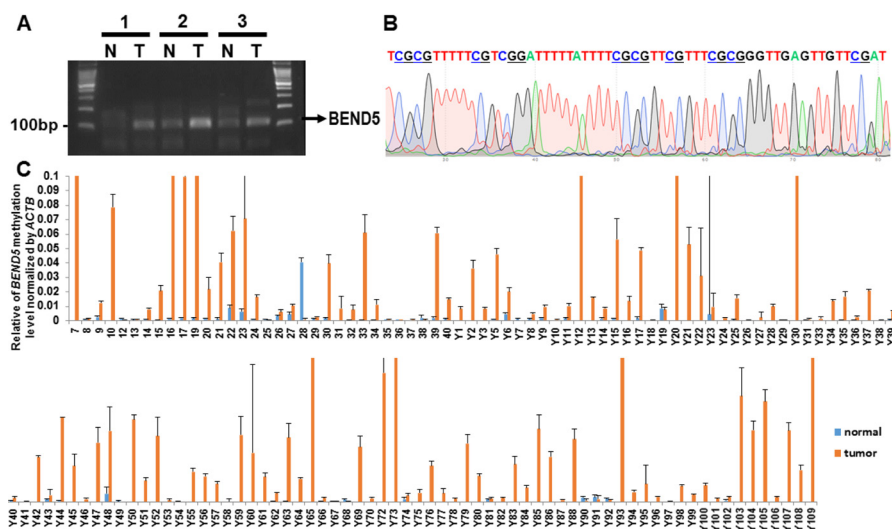

**Supplementary Figure 1: Hypermethylation of the *BEND5* promoter gene was analyzed in CRC patients.** (A) The end products of *BEND5* QMSP were run in the gel shown on the right molecular weight. (B) Bisulfite sequencing was performed to verify the specificity of the *BEND5* QMSP assay. (C) Raw data for the *BEND5* QMSP assay in 133 CRC patients. The data are presented as means  $\pm$  s.d. The experiments were performed with at least three technical replicates.

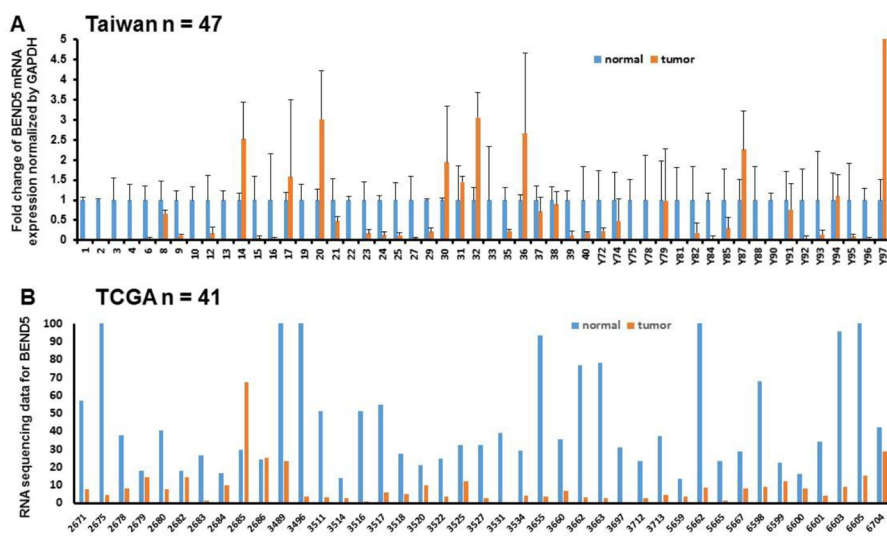

**Supplementary Figure 2: The *BEND5* mRNA expression levels were analyzed in CRC tumors and paired normal colorectal tissues.** (A) The *BEND5* mRNA expression levels were analyzed using real-time RT-PCR in 47 patients in Taiwan. The data are presented as means  $\pm$  s.d. The experiments were performed with at least three technical replicates. (B) The *BEND5* mRNA expression levels were analyzed through the RNA sequencing of paired tissues from normal controls and 41 paired CRC patients from TCGA.

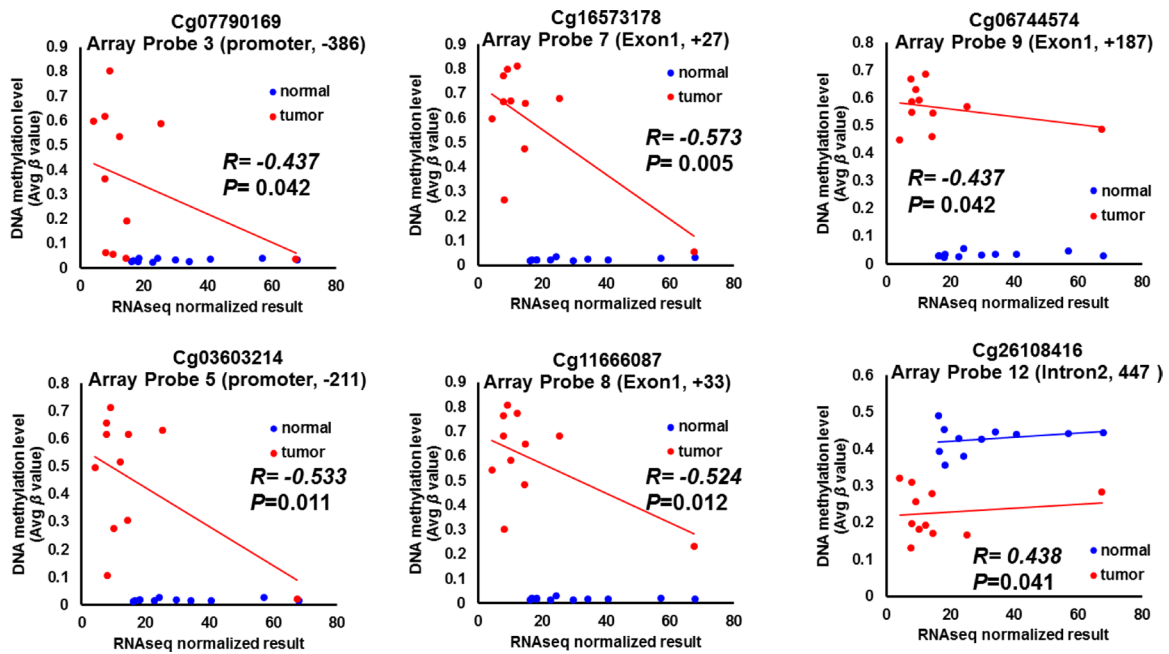

Supplementary Figure 3: Pearson correlation analysis of tissues between DNA methylation and RNA sequencing in 11 normal controls and 11 paired CRC patients.

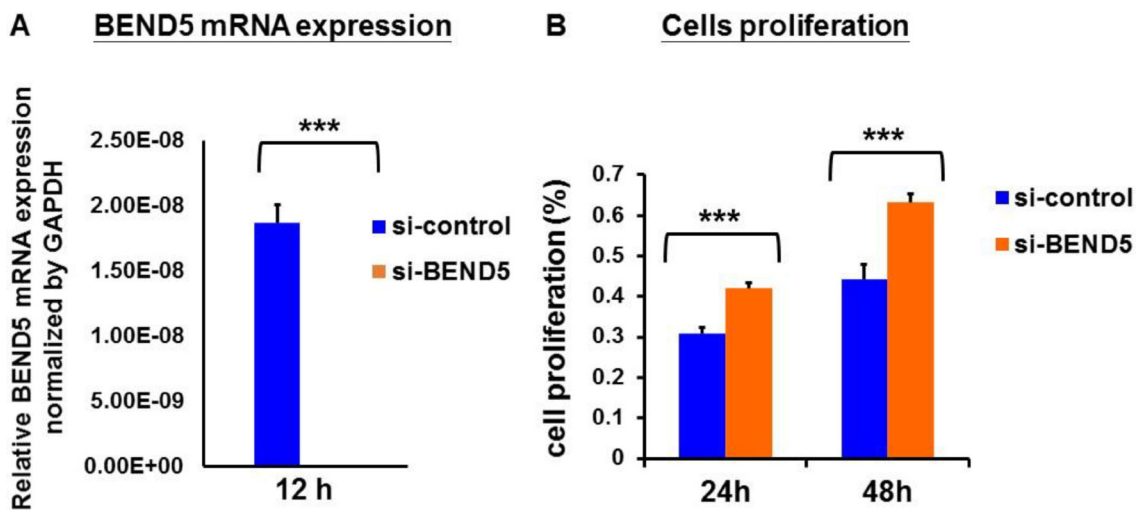

Supplementary Figure 4: Knockdown of endogenous BEND5 mRNA expression induced proliferation of DLD-1 CRC cells. (A) BEND5 mRNA expression analyzed using real-time RT-PCR. (B) Cell proliferation was analyzed using the SRB assay. The data are presented as means  $\pm$  s.d., \*\*\* $P \leq 0.001$ . The experiments were performed with at least three technical replicates.

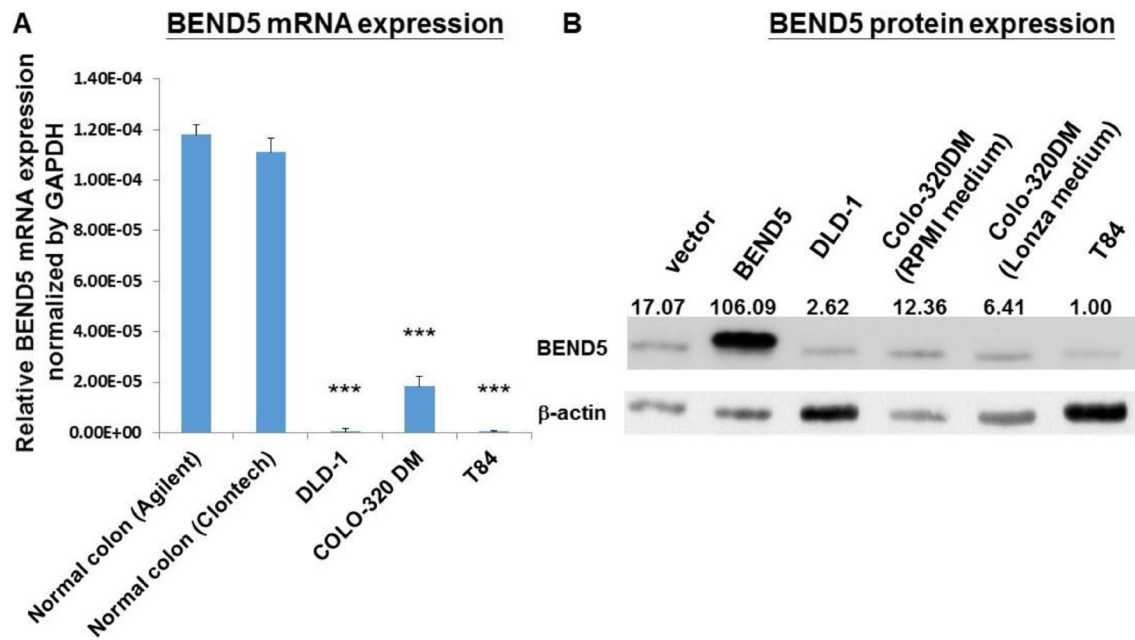

**Supplementary Figure 5: BEND5 mRNA and protein expression analysis in normal tissue and cells.** (A) BEND5 mRNA was highly expressed in normal colon tissues but was not expressed in CRC cell lines. The data are presented as means  $\pm$  s.d.,  $***P \leq 0.001$ . The experiments were performed with at least three technical replicates. (B) The BEND5 protein expression annualized by Western Blot in CRC cell lines and BEND5 plasmid transfected DLD-1 cell lines.

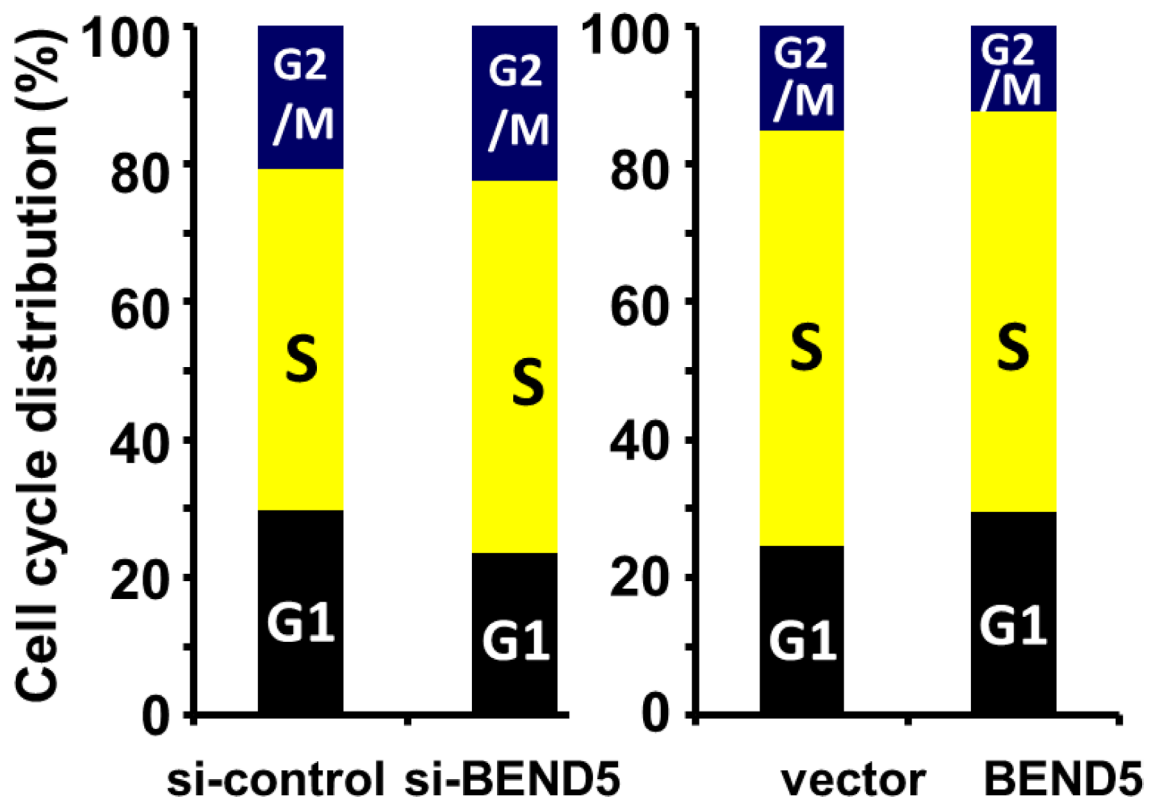

**Supplementary Figure 6: Cells were analyzed using flow cytometry for cell cycle distribution.**

**Supplementary Table 1: The clinical parameters of 26 paired CRC patients who analyzed by Illumina Infinium HumanMethylation450 BeadChip array assays**

| Characteristics                       | Total        |
|---------------------------------------|--------------|
|                                       | <i>n</i> (%) |
| <b>Total</b>                          | 26           |
| <b>Clinicopathological parameters</b> |              |
| <b>Age</b>                            |              |
| < 60                                  | 8 (30.8)     |
| > 60                                  | 18 (69.2)    |
| <b>Sex</b>                            |              |
| Male                                  | 18 (69.2)    |
| Female                                | 8 (30.8)     |
| <b>Tumor type</b>                     |              |
| Adeno                                 | 21 (84.0)    |
| Mucinous                              | 1 (4.0)      |
| Others                                | 3 (12.0)     |
| <b>Tumor stage</b>                    |              |
| Early (stage I and II)                | 16 (61.5)    |
| Late (stage III and IV)               | 10 (38.5)    |
| <b>Primary tumor</b>                  |              |
| Submucosa                             | 1 (3.8)      |
| Muscularis propria                    | 5 (19.2)     |
| Subserosa                             | 17 (65.4)    |
| Penetrate the visceral                | 3 (11.5)     |
| <b>Regional lymph nodes</b>           |              |
| No regional lymph node metastasis     | 17 (65.4)    |
| Metastasis in regional lymph nodes    | 9 (34.6)     |
| <b>Distant metastasis</b>             |              |
| No distant metastasis                 | 24 (92.3)    |
| Distant metastasis                    | 2 (7.7)      |
| <b>Differentiation grade</b>          |              |
| Well                                  | 3 (11.5)     |
| Moderate                              | 18 (69.2)    |
| Poor                                  | 5 (19.2)     |
| <b>Location</b>                       |              |
| colon                                 | 20 (76.9)    |
| Rectal                                | 6 (23.1)     |

**Supplementary Table 2: BEND5 protein expression in relation to clinical parameters for CRC<sup>a</sup>**

| Characteristics                              | Total<br><i>n</i> <sup>b</sup> | BEND5 protein       |                      | <i>P</i> -value |
|----------------------------------------------|--------------------------------|---------------------|----------------------|-----------------|
|                                              |                                | Low<br><i>n</i> (%) | High<br><i>n</i> (%) |                 |
| <b>Overall</b>                               | 94                             | 82 (87.2)           | 12 (12.8)            |                 |
| <b><u>Clinicopathological parameters</u></b> |                                |                     |                      |                 |
| <b>Age</b>                                   |                                |                     |                      |                 |
| < 65                                         | 66                             | 58 (87.9)           | 8 (12.1)             | 0.740           |
| > 65                                         | 27                             | 23 (85.2)           | 4 (14.8)             |                 |
| <b>Sex</b>                                   |                                |                     |                      |                 |
| Male                                         | 68                             | 58 (85.3)           | 10 (14.7)            | 0.500           |
| Female                                       | 26                             | 24 (92.3)           | 2 (7.7)              |                 |
| <b>Tumor type</b>                            |                                |                     |                      |                 |
| Adeno                                        | 83                             | 71 (85.5)           | 12 (14.5)            | 0.402           |
| Mucinous                                     | 10                             | 10 (100.0)          | 0 (0.0)              |                 |
| Small cell                                   | 1                              | 1 (100.0)           | 0 (0.0)              |                 |
| <b>Tumor location</b>                        |                                |                     |                      |                 |
| Colon                                        | 74                             | 63 (85.1)           | 11 (14.9)            | 0.450           |
| Rectal                                       | 20                             | 19 (95.0)           | 1 (5.0)              |                 |
| <b>Differentiation grade</b>                 |                                |                     |                      |                 |
| Well                                         | 19                             | 17 (89.5)           | 2 (10.5)             | 0.845           |
| Moderate                                     | 57                             | 48 (84.2)           | 9 (15.8)             |                 |
| Poor                                         | 6                              | 5 (83.3)            | 1 (16.7)             |                 |
| <b>Tumor stage</b>                           |                                |                     |                      |                 |
| I                                            | 3                              | 3 (100.0)           | 0 (0.0)              | 0.407           |
| II                                           | 42                             | 34 (81.0)           | 8 (19.0)             |                 |
| III                                          | 34                             | 31 (91.2)           | 3 (8.8)              |                 |
| IV                                           | 15                             | 14 (93.3)           | 1 (6.7)              |                 |
| <b>Primary tumor</b>                         |                                |                     |                      |                 |
| Submucosa                                    | 0                              | 0 (0.0)             | 0 (0.0)              | 0.417           |
| Muscularis propria                           | 7                              | 6 (85.7)            | 1 (14.3)             |                 |
| Subserosa                                    | 80                             | 71 (88.8)           | 9 (11.3)             |                 |
| Penetrate the visceral                       | 7                              | 5 (71.4)            | 2 (28.6)             |                 |
| <b>Regional lymph nodes</b>                  |                                |                     |                      |                 |
| No regional lymph node metastasis            | 50                             | 41 (82.0)           | 9 (18.0)             | 0.130           |
| Metastasis in regional lymph nodes           | 44                             | 41 (93.2)           | 2 (6.8)              |                 |
| <b>Distant metastasis</b>                    |                                |                     |                      |                 |
| No distant metastasis                        | 79                             | 68 (86.1)           | 10 (13.9)            | 0.683           |
| Distant metastasis                           | 15                             | 14 (93.3)           | 1 (6.7)              |                 |

<sup>a</sup>These results were analyzed by the Fisher's exact test.

<sup>b</sup>For some categories, the number of samples (*n*) was lower than the overall number analyzed because clinical data were unavailable for these samples.

**Supplementary Table 3: Cox proportional hazard model of clinical parameters and BEND5 methylation levels associated with 5-year overall survival in patients with colorectal cancer from TCGA data set**

| Variable                          | Multivariate analysis <sup>a</sup> |             |                      |
|-----------------------------------|------------------------------------|-------------|----------------------|
|                                   | HR                                 | 95% CI      | P-value <sup>c</sup> |
| Sex                               | 1.216                              | 0.635–2.327 | 0.556                |
| Age                               | 1.036                              | 1.008–1.065 | 0.012*               |
| Tumor type                        | 2.674                              | 1.145–6.244 | 0.023*               |
| Race                              | 1.103                              | 0.454–2.679 | 0.829                |
| Stage                             | 2.836                              | 1.864–4.314 | < 0.001***           |
| BEND5 <sup>b</sup><br>methylation | 2.042                              | 1.061–3.933 | 0.033*               |

<sup>a</sup>These results were analyzed by the Cox regression model.

<sup>b</sup>BEND5 was considered hypermethylated at an average  $\beta$  value of > 0.5.

<sup>c</sup>\* $P < 0.05$ ; \*\* $P < 0.01$ ; \*\*\* $P < 0.001$ .

**Supplementary Table 4: The predicted BEND5 binding sites in promoters of genes**

| Gene name     | Sequence (5' to 3') |
|---------------|---------------------|
| <i>BCL2</i>   | TTAATCAGAAGA        |
| <i>CCNB1</i>  | TCCAATTGCTGA        |
| <i>CCND1</i>  | CCAATTAGGAA         |
| <i>CCND2</i>  | TCCTTAATAACGAGA     |
| <i>PCNA</i>   | CCAATGGGAG          |
| <i>CDKN1A</i> | TATTCAGGAGA         |

**Supplementary Table 5: List of primers sequences and their reaction conditions used in the present study**

| Real-time RT-PCR <sup>a</sup>                |              | Sequence (5' to 3')               | Probe | T <sub>m</sub> (°C) | Size (bp) |
|----------------------------------------------|--------------|-----------------------------------|-------|---------------------|-----------|
| <i>GAPDH</i>                                 | Forward      | AGCCACATCGCTCAGACAC               | #60   | 60                  | 66        |
|                                              | Reverse      | GCCCAATACGACCAAATCC               |       |                     |           |
| <i>BEND5</i>                                 | Forward      | AGCCACATCGCTCAGACAC               | #1    | 60                  | 95        |
|                                              | Reverse      | GCCCAATACGACCAAATCC               |       |                     |           |
| <i>BCL2</i>                                  | Forward      | ACAGAGGATCATGCTGTACTTAAAAA        | #6    | 60                  | 96        |
|                                              | Reverse      | TTATTTTCATGAGGCACGTTATTATTAG      |       |                     |           |
| <i>CCNB1</i>                                 | Forward      | ACATGGTGCACCTTTCCTCCT             | #18   | 60                  | 103       |
|                                              | Reverse      | AGGTAATGTTGTAGAGTTGGTGTCC         |       |                     |           |
| <i>CCND1</i>                                 | Forward      | GACCTTCGTTGCCCTCTGT               | #49   | 60                  | 105       |
|                                              | Reverse      | CTCAGGTTTCAGGCCTTGC               |       |                     |           |
| <i>CCND2</i>                                 | Forward      | GGACATCCAACCCTACATGC              | #49   | 60                  | 71        |
|                                              | Reverse      | CGCACTTCTGTTCCCTCACAG             |       |                     |           |
| <i>PCNA</i>                                  | Forward      | TGGAGAAGCTTGGAAATGGAAA            | #69   | 60                  | 95        |
|                                              | Reverse      | GAAGTGGTTCATTCATCTCTATGG          |       |                     |           |
| <i>CDKN1A</i>                                | Forward      | TCACTGTCTTGTACCCTTGTGC            | #32   | 60                  | 128       |
|                                              | Reverse      | GGCGTTTGGAGTGGTAGAAA              |       |                     |           |
| <i>ACTIN</i>                                 | Forward      | CCAACCGCGAGAAGATGA                | #64   | 60                  | 97        |
|                                              | Reverse      | CCAGAGGCGTACAGGGATAG              |       |                     |           |
| <b>Quantitative methylation-specific PCR</b> |              |                                   |       |                     |           |
| <i>ACTB</i>                                  | Forward      | TGGTGATGGAGGAGGTTTAGTAAGT         |       | 60                  | 132       |
|                                              | Reverse      | AACCAATAAAACCTACTCCTCCCTTAA       |       |                     |           |
|                                              | TagMan probe | ACCACCACCCAACACACAATAACAAACACA    |       |                     |           |
| <i>BEND5</i>                                 | M-Forward    | GTTTGGGTTTTGGGGAGTC               |       | 63                  | 109       |
|                                              | M-Reverse    | GATCGAACAACTCAACCCG               |       |                     |           |
|                                              | TagMan probe | CGAAAATAAAAATCCGACGA              |       |                     |           |
| <i>GAPDH</i>                                 | Forward      | GGT AGT TGT TAG GAA AGT TTG TTG G |       | 60                  | 138       |
|                                              | Reverse      | TAA TCT AAA AAA AAC ATC ACC CAA A |       |                     |           |

<sup>a</sup>RT-PCR: reverse-transcriptase polymerase chain reaction.
